# Supplementary material for: Molecular and Microscopic-Based Characterization ofPlasmodiumspp. in Fars and Hormozgan Provinces, South of Iran
Source: Hindawi journal article supplement (doi:10.1155/2014/935469), 2014-01-01

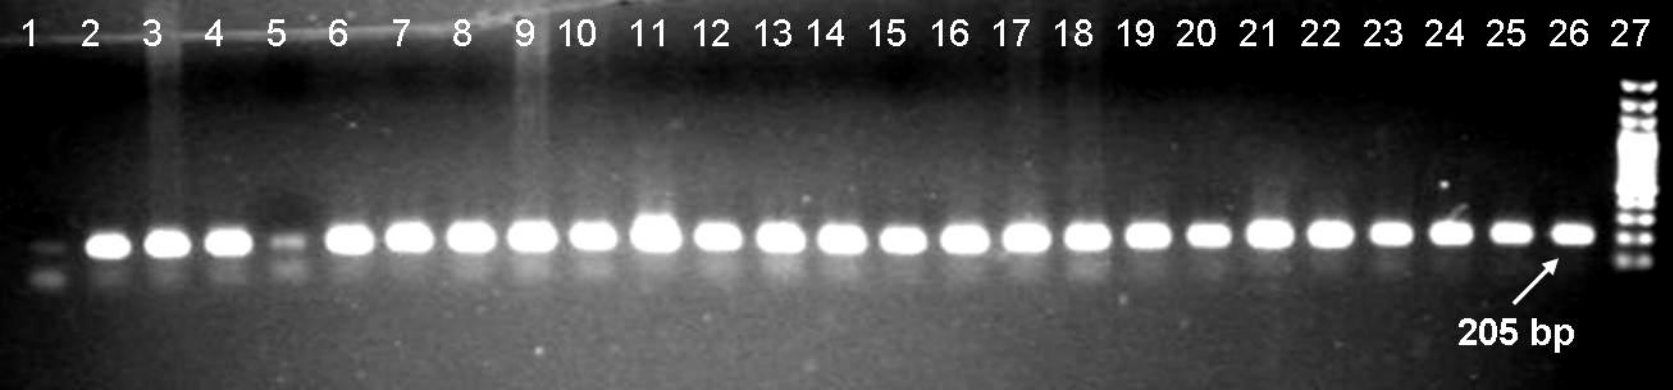

Supplement: f1 [file 935469.f1.pdf]
